# Supplementary material
Source: publisher site journal article supplement (https://www.kjim.org/upload/media/kjim-2025-130-Supplementary-Table-4.pdf)
Supplement: Supplementary file 1 [file kjim-2025-130-Supplementary-Table-4.pdf]

**Supplementary Table 4. ACT and QLQAKA during the study period**

|                             |     | Subject #1 |        | Subject #2 |        | Subject #3 |        |
|-----------------------------|-----|------------|--------|------------|--------|------------|--------|
|                             |     | ACT        | QLQAKA | ACT        | QLQAKA | ACT        | QLQAKA |
| Mepolizumab treatment phase | V1  | 14         | 53     | 22         | 56     | 20         | 77     |
|                             | V2  | 20         | 57     | 19         | 71     | 24         | 80     |
|                             | V3  | 21         | 54     | 24         | 77     | 24         | 82     |
|                             | V4  | 13         | 46     | 22         | 79     | 22         | 84     |
|                             | V5  | 23         | 65     | 24         | 74     | 23         | 83     |
|                             | V6  | 20         | 59     | 24         | 76     | 24         | 81     |
|                             | V7  | 14         | 47     | 24         | 82     | 23         | 81     |
|                             | V8  | 13         | 49     | 24         | 80     | 24         | 81     |
|                             | V9  | 11         | 46     | 24         | 80     | 24         | 81     |
|                             | V10 | 23         | 64     | 24         | 80     | 24         | 76     |
|                             | V11 | 23         | 64     | 24         | 81     | 22         | 82     |
|                             | V12 | 17         | 42     | 24         | 76     | 24         | 79     |
| Follow-up phase             | V13 | 16         | 45     | 24         | 80     | 22         | 81     |
|                             | V14 | 17         | 49     | 24         | 83     | 21         | 78     |
|                             | V15 | 12         | 37     | 24         | 83     | 24         | 77     |
|                             | V16 | 14         | 43     | 25         | 84     | 20         | 78     |

ACT, Asthma Control Test; QLQAKA, Quality of Life Questionnaire for Adult Korean Asthmatics; V, visit.
